# Supplementary material for: Porous organic/inorganic hybrid one-dimensional photonic crystals for rapid visual detection of organic solvents
Source: Royal Society of Chemistry journal article supplement (doi:10.1039/c7tc05390h), 2018-01-01
Supplement: c7tc05390h1.pdf [file c7tc05390h1.pdf]

Electronic Supplementary Material (ESI) for Journal of Materials Chemistry C.  
This journal is © The Royal Society of Chemistry 2017

Supplementary Information for

## Porous organic/inorganic hybrid one-dimensional photonic crystals for rapidly visual detection of organic solvents

Donghui Kou,<sup>a</sup> Shufen Zhang,<sup>a</sup> Jodie L. Lutkenhaus,<sup>b</sup> Lin Wang<sup>a</sup>, Bingtao Tang,<sup>a</sup> and Wei Ma<sup>\*a</sup>

<sup>a</sup>State Key Laboratory of Fine Chemicals, Dalian University of Technology, Dalian, Liaoning 116023, P. R. China.

<sup>b</sup>Artie McFerrin Department of Chemical Engineering and §Department of Materials Science and Engineering, Texas A&M University, College Station, Texas 77843, United States.

\*E-mail: weima@dlut.edu.cn; Tel: +86-411-84986506.

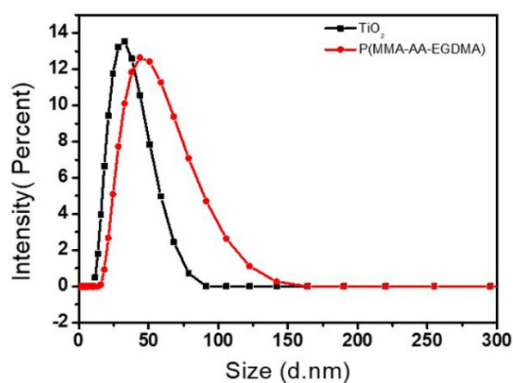

**Fig. S1** Particle size distribution (vol %) of the P(MMA-AA-EGDMA) microemulsion (red line filled with circles) and TiO<sub>2</sub> sol (black line filled with square);

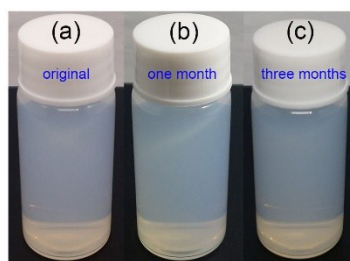

**Fig. S2** Photographs of the polymer microemulsion (a) original state, (b) after one month and (c) after three months.

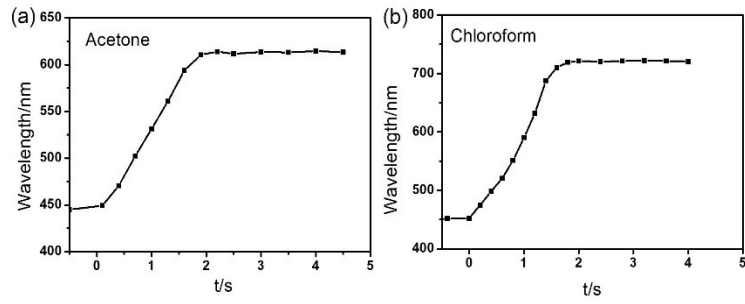

**Fig. S3** Relation between the maximum reflectance wavelength of 1DPC sensor and responsive time in (a) acetone and (b) chloroform

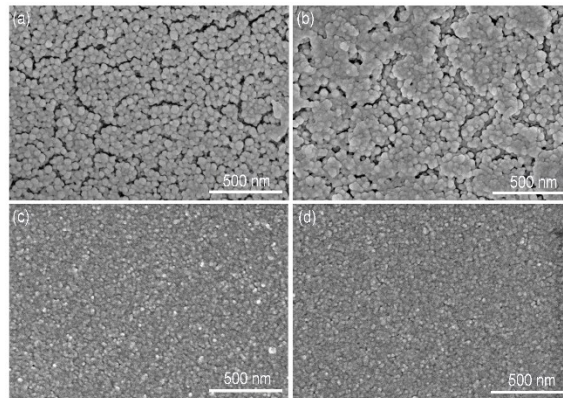

**Fig. S4** SEM images of (a) polymer layer before immersing in acetone; (b) polymer layer after immersing in acetone; (c) TiO<sub>2</sub> layer before immersing in acetone; (d) TiO<sub>2</sub> layer after immersing in acetone

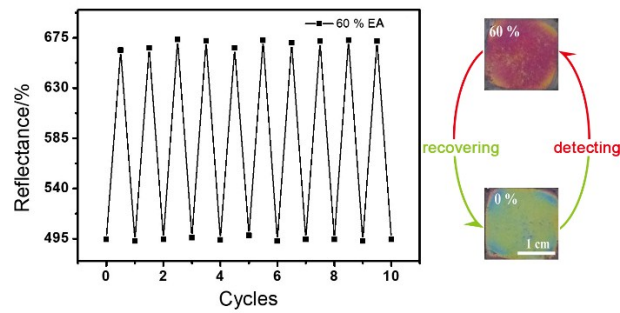

**Fig. S5** Recycle detection test of the 1DPC sensor in 60 % ethanol aqueous solution.

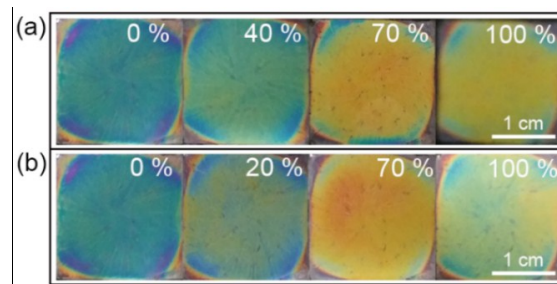

**Fig. S6** Color variation of 1DPCs soaked in different concentration (a) alcohol solution (0 %, 40 %, 70 %, 100 %) and (b) acetone-water mixtures (0 %, 20 %, 70 %, 100 %)
